# Supplementary material for: Growing oocyte-specific transcription-dependent de novo DNA methylation at the imprinted Zrsr1-DMR
Source: PubMed Central journal article supplement (PMC5989421; doi:10.1186/s13072-018-0200-6), 2018-06-06
Supplement: 13072_2018_200_MOESM1_ESM.pdf [file 13072_2018_200_MOESM1_ESM.pdf]

MW D5-1 D5-2 D10 D15 MII PC

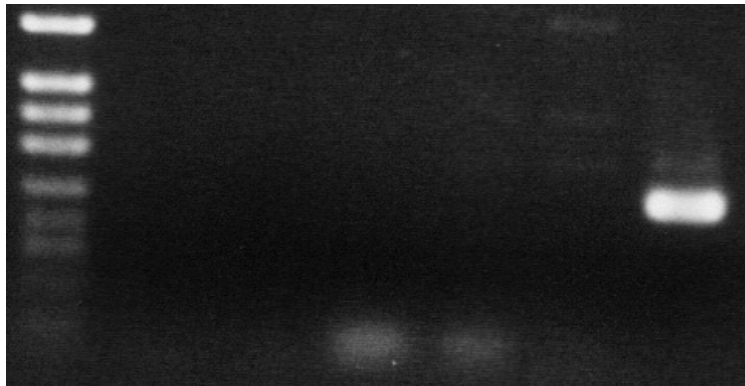

**Joh *et al.*, Additional file 1: Figure S1.**
