# Supplementary material for: Growing oocyte-specific transcription-dependent de novo DNA methylation at the imprinted Zrsr1-DMR
Source: PubMed Central journal article supplement (PMC5989421; doi:10.1186/s13072-018-0200-6), 2018-06-06

A

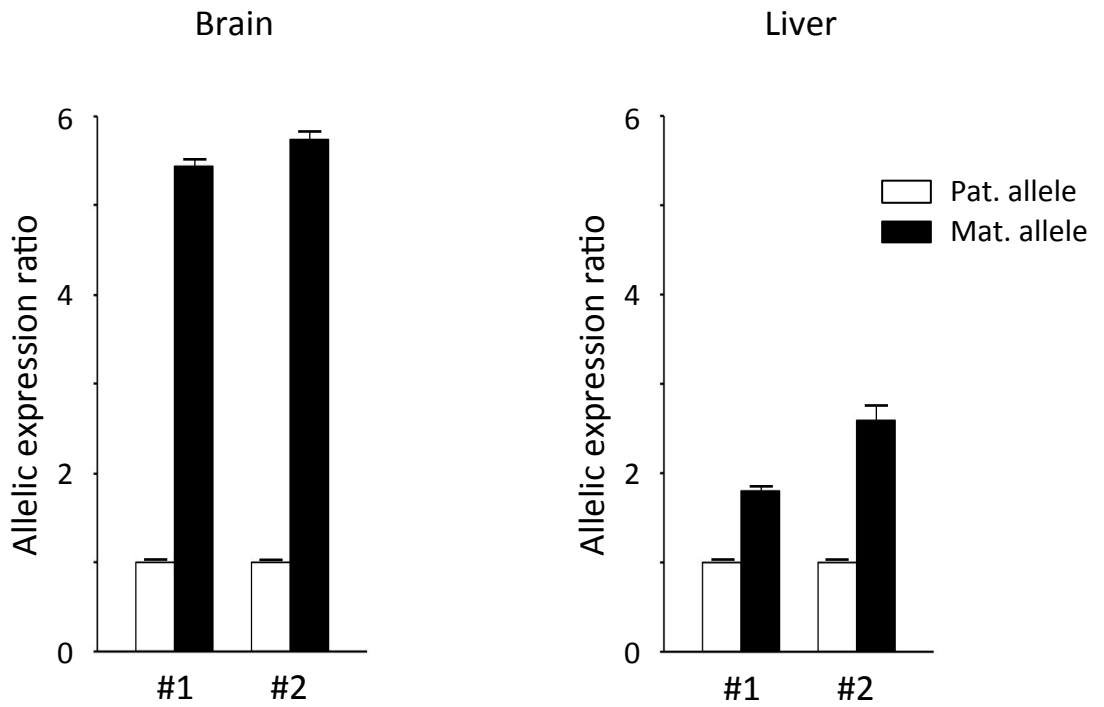

B

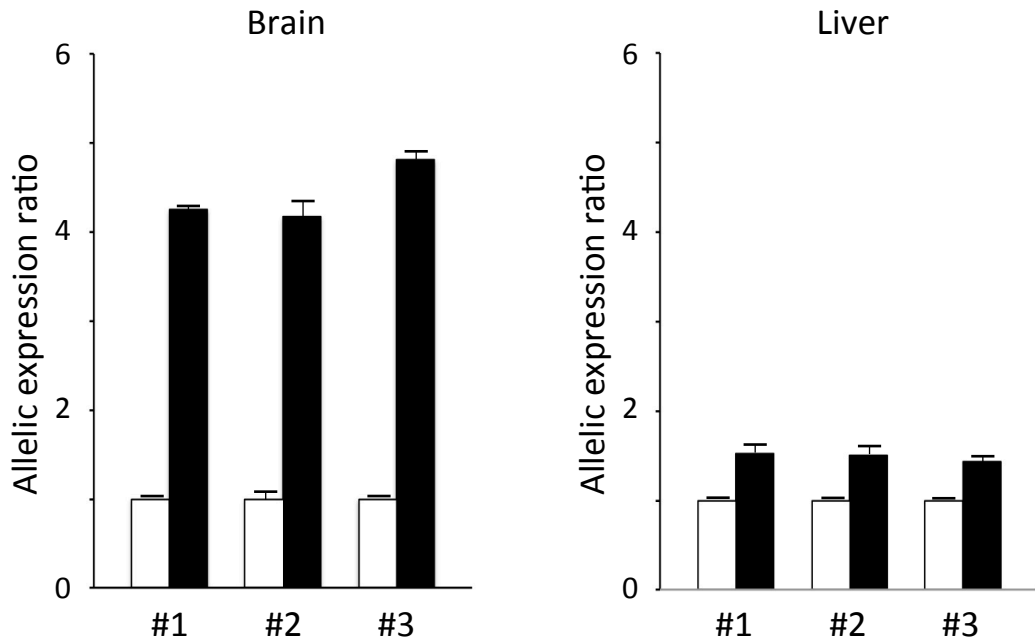

Supplement: 13072_2018_200_MOESM3_ESM.pdf [file 13072_2018_200_MOESM3_ESM.pdf]
